# Supplementary material for: Software-Tool für Reintonaudiometrie
Source: Springer Nature journal article supplement (doi:10.1007/s00106-015-0093-7), 2015-11-25
Supplement: MOESM1 [file 8035044]

## Sheet: Einschlusskriterien
	Einschlusskriterien
	T. Rahne, v.de2.1 (2015)
	Demografische Daten					Empfehlung für Einschluss
	ID (optional):	123				Referenz-Audiogramm						Empfehlung
	Alter (Jahre)	65				Audiogramm vor Hörsturz						NEIN
	Geschlecht	weiblich				Audiogramm Gegenseite						JA
						Audiogramm nach ISO 7029						JA
	Einschlusskriterien
	Minimale Schwere des Hörverlustes							50						4PTA, dB HL
	Minimale Differenz (3 benachbarte meistbetroffene Frequenzen):							30						PTA, dB HL
	Audiogramme		Wenn HL > 115 dB bitte "120" eingeben!
	nur Luftleitungsschwellen!		Frequenz (kHz)									Daten-prüfung	4PTA (dB HL)	Einteilung
			0.125	0.25	0.5	1	2	3	4	6	8			WHO	EC
	Audiogramm vor Hörsturz	dB HL	30	30	30	40	30	40	40	30	35	OK	35	1	1
	Audiogramm Gegenseite		5	10	10	15	10	20	30	35	40	OK	16.25	0	0
	Audiogramm nach ISO 7029		5	5	10	10	10	15	15	20	25		11.25	0	0
	Aktuelles Audiogramm		25	35	55	60	60	55	40	30	30	OK	53.75	2	2
	Berechung des hörsturzbedingten Hörverlusts (HV)
			Hörsturzbedingter Hörverlust (Differenz zu Referenzaudiogramm)									Mittlerer HV (dB) für Frequenzbereich von … bis … kHz							max. HV
	Referenz (Baseline)		0.125	0.25	0.5	1	2	3	4	6	8	0,125-0,5	0,25-1	0,5-2	1-3	2-4	3-6	4-8
	Audiogramm vor Hörsturz		-5	5	25	20	30	15	0	0	-5	8.33333	16.6667	25	21.6667	15	5	-1.66667	25
	Audiogramm Gegenseite		20	25	45	45	50	35	10	-5	-10	30	38.3333	46.6667	43.3333	31.6667	13.3333	-1.66667	46.6667
	Audiogramm nach ISO7029		20	30	45	50	50	40	25	10	5	31.6667	41.6667	48.3333	46.6667	38.3333	25	13.3333	48.3333

## Sheet: ISO 7029
	Berechnung der Hörschwellen nach ISO 7029
	Alter (Jahre)	65
	Alter - 18 Jahre	47
	Parameter (aus ISO 7029)
				Berechnung nach Alter und Geschlecht
		alpha (dB/Jahr2)		Hörverlust (dB)		Hörverlust (dB; gerundet)
	Frequenz (Hz)	Männlich	Weiblich	Männlich	Weiblich	Männlich	Weiblich
	125	0.003	0.003	6.627	6.627	5	5
	250	0.003	0.003	6.627	6.627	5	5
	500	0.0035	0.0035	7.7315	7.7315	10	10
	1000	0.004	0.004	8.836	8.836	10	10
	1500	0.0055	0.005	12.1495	11.045	10	10
	2000	0.007	0.006	15.463	13.254	15	15
	3000	0.0115	0.0075	25.4035	16.5675	25	15
	4000	0.016	0.009	35.344	19.881	35	20
	6000	0.018	0.012	39.762	26.508	40	25
	8000	0.022	0.015	48.598	33.135	50	35

## Sheet: Einteilung des Hörverlusts
	Grad des Hörverlusts
	Grad des Hörverlusts		dB HL des besser hörenden Ohres
			WHO (0.5, 1, 2, 4 kHz)		EC (0.5, 1, 2, 4 kHz)
	Grad	Kategorie	min	max	min	max
	0	kein Hörverlust / normal		25		20
	1	leichter Hörverlust	26	40	21	39
	2	mittlerer Hörverlust	41	60	40	69
	3	schwerer Hörverlust	61	80	70	94
	4	sehr schwerer Hörverlust einschl. Taubheit	81		95
	Audiogramm			Einteilung
			4PTA (dB HL)	WHO	EC
	Audiogramm vor Hörsturz		35	1	1
	Audiogramm Gegenseite		16.25	0	0
	Audiogramm nach ISO 7029		11.25	0	0
	Aktuelles Audiogramm		53.75	2	2
